# Supplementary material
Source: PubMed Central journal article supplement (PMC2888912)
Supplement: NIHMS104323-supplement-1.pdf [file NIHMS104323-supplement-1.pdf]

## Supplementary Material

### Development of a Synthetic PCB Mixture Resembling the Average Polychlorinated Biphenyl Profile in Chicago Air

*H. Zhao<sup>1</sup>, A. Adamcakova-Dodd<sup>1</sup>, D. Hu<sup>2</sup>, K.C. Hornbuckle<sup>2</sup>, C.L. Just<sup>2</sup>,  
L.W. Robertson<sup>1</sup>, P.S. Thorne<sup>1</sup>, H.-J. Lehmler<sup>1</sup>*

*<sup>a</sup>The University of Iowa, Department of Occupational and Environmental Health, 100  
Oakdale Campus, 124 IREH, Iowa City, IA, 52242, USA; <sup>b</sup>Department of Civil and  
Environmental Engineering, University of Iowa, Iowa City, IA, 52242, USA*

*\*Corresponding author:*

Hans-Joachim Lehmler,  
100 Oakdale Campus, #221 IREH, Iowa City, IA  
Phone: +1-319-335-4211  
Fax: +1-319-335-4290  
[hans-joachim-lehmler@uiowa.edu](mailto:hans-joachim-lehmler@uiowa.edu)

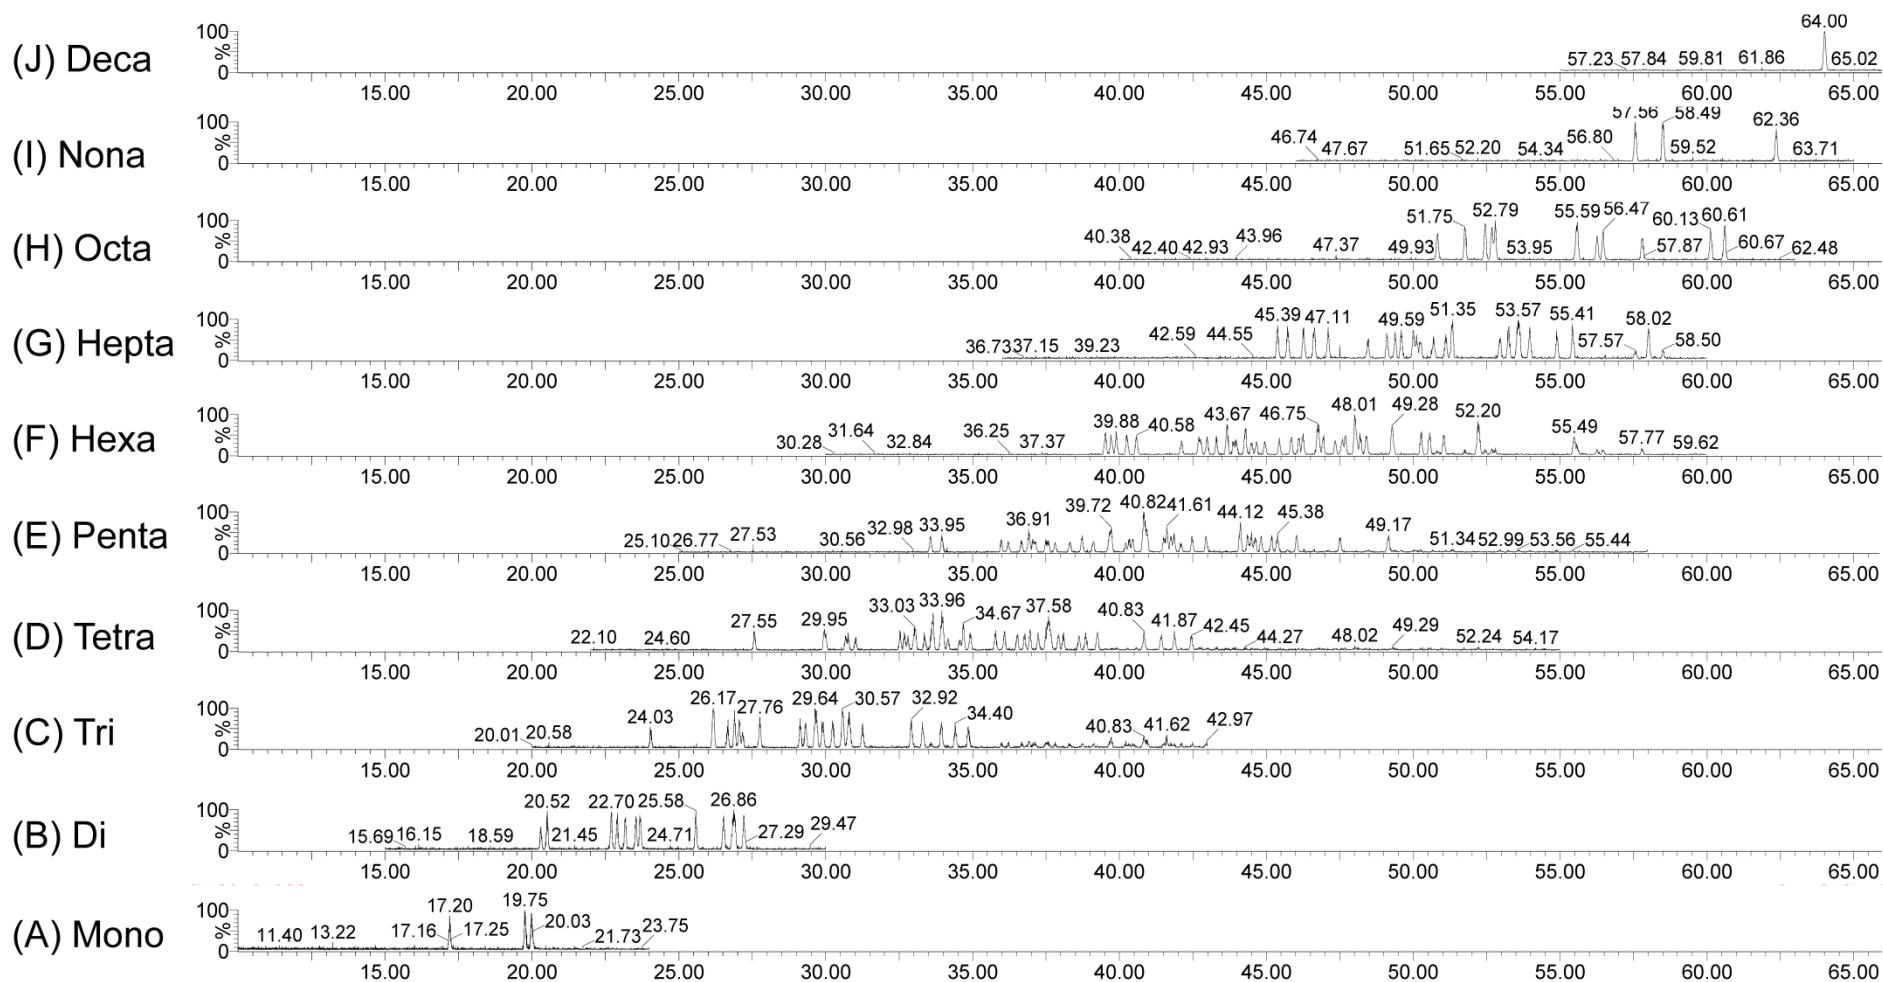

**Figure S1.** Representative GC/MS/MS chromatograms showing the homologue composition of the 209 PCB congener standard. The analysis was done in the monitored reaction mode. A detailed description of the gas chromatographic separation is provided under Materials and Methods.

**Table S1.** PCB congener profiles of the synthetic Chicago air mixture (CAM) and the IIT Chicago air profile (mass percentage).

| PCB congener | CAM   | IIT CAP | PCB congener | CAM  | IIT CAP | PCB congener | CAM  | IIT CAP |
|--------------|-------|---------|--------------|------|---------|--------------|------|---------|
| 4+10         | 2.79  | 1.65    | 64           | 1.44 | 1.12    | 158          | 0.33 | 0.20    |
| 7+9          | 0.63  | 0.71    | 100+95       | 1.10 | 4.62    | 126          | 0.00 | 0.00    |
| 6            | 1.20  | 1.28    | 63           | 0.15 | 0.09    | 178          | 0.00 | 0.06    |
| 5+8          | 11.85 | 9.91    | 74+70+76     | 3.72 | 3.27    | 175          | 0.00 | 0.01    |
| 19           | 0.64  | 0.27    | 66           | 4.05 | 2.31    | 187+182      | 0.03 | 0.18    |
| 12+13        | 0.13  | 0.28    | 91           | 0.38 | 0.74    | 183          | 0.04 | 0.11    |
| 18           | 2.61  | 4.02    | 56+60        | 2.84 | 1.19    | 128          | 0.43 | 0.14    |
| 15+17        | 4.21  | 4.21    | 84+92        | 0.99 | 3.52    | 167          | 0.10 | 0.08    |
| 24           | 0.08  | 0.14    | 89           | 0.05 | 0.52    | 185          | 0.04 | 0.02    |
| 27           | 0.34  | 0.16    | 99+83        | 3.39 | 2.06    | 174          | 0.04 | 0.13    |
| 16           | 2.72  | 1.67    | 119+97       | 1.76 | 0.87    | 177          | 0.03 | 0.08    |
| 32           | 1.41  | 1.93    | 81           | 0.01 | 0.23    | 202+171+173  | 0.02 | 0.06    |
| 29+26        | 0.51  | 0.99    | 87           | 0.16 | 1.80    | 156+157+200  | 0.42 | 0.08    |
| 25           | 0.43  | 0.41    | 85           | 0.58 | 0.73    | 172          | 0.01 | 0.02    |
| 31           | 5.33  | 3.83    | 136          | 0.08 | 0.57    | 197          | 0.00 | 0.00    |
| 28           | 3.43  | 4.10    | 77           | 0.24 | 0.08    | 180+193      | 0.07 | 0.17    |
| 33           | 1.88  | 5.62    | 110          | 0.38 | 3.48    | 191          | 0.01 | 0.02    |
| 53           | 0.31  | 0.44    | 82           | 0.55 | 0.33    | 170+190+...  | 0.16 | 0.46    |
| 51           | 1.30  | 0.19    | 151+135+144  | 0.13 | 0.90    | 201          | 0.00 | 0.48    |
| 22           | 2.15  | 2.36    | 107          | 0.08 | 0.15    | 203          | 0.00 | 0.05    |
| 45           | 5.61  | 0.57    | 123+149      | 0.67 | 1.19    | 196          | 0.00 | 0.03    |
| 46           | 0.28  | 0.25    | 118          | 6.71 | 1.55    | 189          | 0.01 | 0.00    |
| 52           | 4.56  | 5.88    | 134          | 0.02 | 0.10    | 208+195      | 0.00 | 0.02    |
| 43           | 0.16  | 0.21    | 114+131      | 0.10 | 0.06    | 207          | 0.00 | 0.02    |
| 49           | 2.61  | 1.85    | 146          | 0.17 | 0.30    | 194          | 0.01 | 0.01    |
| 47+44        | 1.03  | 5.04    | 105+132+153  | 3.08 | 1.92    | 205          | 0.00 | 0.00    |
| 48           | 0.92  | 0.60    | 141          | 0.48 | 0.26    | 206          | 0.00 | 0.01    |
| 37           | 0.98  | 0.83    | 137+176      | 0.17 | 0.02    | 209          | 0.00 | 0.00    |
| 42           | 0.84  | 0.91    | 130          | 0.11 | 0.14    |              |      |         |
| 41+71+40     | 2.71  | 1.64    | 163+138+129  | 0.95 | 1.51    |              |      |         |

**Table S2.** PCB congener profiles of the synthetic Chicago air mixture (CAM) and the isbrp 2007 Chicago air profile (mass percentage).

| PCB congener | CAM  | isbrp CAP | PCB congener | CAM  | isbrp CAP | PCB congener | CAM  | isbrp CAP |
|--------------|------|-----------|--------------|------|-----------|--------------|------|-----------|
| 1            | 0.29 | 0.77      | 43           | 0.14 | 0.14      | 89           | 0.05 | 0.10      |
| 2            | 0.01 | 0.61      | 45           | 4.74 | 0.51      | 90+101+113   | 0.61 | 2.24      |
| 3            | 0.09 | 0.76      | 46           | 0.24 | 0.19      | 91           | 0.32 | 0.12      |
| 4            | 2.28 | 4.07      | 48           | 0.77 | 0.26      | 92           | 0.24 | 0.20      |
| 5            | 5.49 | 2.88      | 49+69        | 2.21 | 0.99      | 93           | 0.04 | 0.21      |
| 6            | 1.01 | 1.23      | 50+53        | 0.26 | 0.27      | 94           | 0.01 | 1.08      |
| 7            | 0.17 | 0.26      | 51           | 1.10 | 0.22      | 95           | 0.89 | 2.26      |
| 8            | 4.52 | 6.26      | 52           | 3.85 | 4.35      | 96           | 0.02 | 0.05      |
| 9            | 0.36 | 0.32      | 54           | 0.01 | 0.08      | 98           | 0.07 | 0.06      |
| 10           | 0.08 | 0.07      | 55           | 2.91 | 0.21      | 100          | 0.04 | 0.33      |
| 11           | 0.01 | 3.81      | 56           | 1.50 | 0.29      | 102          | 0.00 | 1.03      |
| 12+13        | 0.11 | 0.25      | 57           | 0.01 | 0.08      | 103          | 0.01 | 0.10      |
| 15           | 1.39 | 1.57      | 58           | 0.00 | 0.10      | 104          | 0.00 | 0.06      |
| 16           | 2.30 | 2.41      | 59           | 0.09 | 0.29      | 105          | 1.79 | 0.26      |
| 17           | 2.17 | 2.72      | 60           | 0.90 | 0.14      | 106          | 0.08 | 0.14      |
| 18+30        | 2.21 | 6.24      | 61+70+...    | 6.30 | 1.36      | 107+124      | 0.14 | 0.12      |
| 19           | 0.54 | 0.46      | 62+75        | 0.12 | 0.07      | 108          | 0.14 | 0.04      |
| 20+28        | 2.90 | 5.72      | 63           | 0.12 | 0.07      | 110          | 0.32 | 0.78      |
| 21+33        | 3.40 | 2.56      | 64           | 1.22 | 0.49      | 111          | 0.00 | 0.09      |
| 22           | 1.81 | 1.05      | 66           | 3.42 | 0.58      | 112          | 1.38 | 1.70      |
| 23           | 0.01 | 0.03      | 67           | 0.09 | 0.10      | 114          | 0.05 | 0.16      |
| 24           | 0.06 | 0.86      | 68           | 0.00 | 1.71      | 115          | 1.56 | 0.98      |
| 25           | 0.36 | 0.20      | 72           | 0.01 | 0.08      | 117          | 0.00 | 0.29      |
| 26+29        | 0.43 | 0.58      | 73           | 0.09 | 0.38      | 118          | 5.67 | 0.85      |
| 27           | 0.28 | 0.17      | 77           | 0.21 | 0.29      | 120          | 0.00 | 0.10      |
| 31           | 4.50 | 4.33      | 78           | 0.00 | 0.12      | 121          | 0.00 | 0.18      |
| 32           | 1.19 | 1.25      | 79           | 0.00 | 0.19      | 122          | 0.06 | 0.12      |
| 34           | 0.02 | 0.03      | 80           | 0.00 | 0.04      | 12           | 0.32 | 0.79      |
| 35           | 0.05 | 0.04      | 81           | 0.01 | 0.19      | 126          | 0.00 | 0.84      |
| 36           | 0.01 | 0.03      | 82           | 0.47 | 1.72      | 127          | 0.00 | 0.07      |
| 37           | 0.83 | 0.59      | 83+99        | 2.87 | 1.52      | 128+166      | 0.37 |           |
| 38           | 0.00 | 0.03      | 84           | 0.60 | 0.29      | 129+138+163  | 0.80 | 0.85      |
| 39           | 0.01 | 0.04      | 85+116       | 1.31 | 0.52      | 130          | 0.09 | 0.18      |
| 40+41+71     | 2.29 | 0.65      | 86+87+...    | 2.08 | 0.38      | 131          | 0.03 | 0.40      |
| 42           | 0.71 | 0.42      | 88           | 0.32 | 0.16      | 132          | 0.38 | 0.22      |

**Table S2 – continued.** PCB congener profiles of the synthetic Chicago air mixture (CAM) and the isbrp 2007 Chicago air profile (mass percentage).

| PCB congener | CAM  | isbrp CAP | PCB congener | CAM  | isbrp CAP |
|--------------|------|-----------|--------------|------|-----------|
| 133          | 0.01 | 0.10      | 178          | 0.00 | 0.25      |
| 134+139+140  | 0.02 | 0.39      | 179          | 0.01 | 0.15      |
| 135+151      | 0.08 | 0.32      | 180+193      | 0.06 | 0.22      |
| 136          | 0.07 | 0.18      | 181          | 0.00 | 0.25      |
| 137          | 0.14 | 0.13      | 182          | 0.00 | 0.17      |
| 141          | 0.41 | 0.44      | 183          | 0.03 | 0.18      |
| 142          | 0.02 | 0.14      | 184          | 0.00 | 0.10      |
| 143          | 0.02 | 0.06      | 185          | 0.03 | 0.18      |
| 144          | 0.03 | 0.11      | 186          | 0.00 | 0.15      |
| 145          | 0.00 | 0.13      | 187          | 0.03 | 0.28      |
| 146          | 0.14 | 0.22      | 188          | 0.00 | 0.05      |
| 147+149      | 0.25 | 0.96      | 189          | 0.01 | 0.41      |
| 148          | 0.00 | 0.06      | 190          | 0.02 | 0.10      |
| 150          | 0.00 | 0.05      | 191          | 0.00 | 0.09      |
| 152          | 0.00 | 0.10      | 192          | 0.00 | 0.12      |
| 153+168      | 0.43 | 0.79      | 194          | 0.01 | 0.17      |
| 154          | 0.00 | 0.16      | 195          | 0.00 | 0.10      |
| 155          | 0.00 | 0.07      | 196          | 0.00 | 0.30      |
| 156+157      | 0.35 | 0.09      | 197          | 0.00 | 0.04      |
| 158          | 0.28 | 0.21      | 198+199      | 0.00 | 0.13      |
| 159          | 0.00 | 0.08      | 200          | 0.00 | 0.11      |
| 160          | 0.55 | 0.63      | 201          | 0.00 | 0.15      |
| 161          | 0.09 | 0.10      | 202          | 0.00 | 0.11      |
| 162          | 0.01 | 0.09      | 203          | 0.00 | 0.24      |
| 164          | 0.14 | 0.13      | 205          | 0.00 | 0.06      |
| 165          | 0.00 | 0.12      | 206          | 0.00 | 0.13      |
| 167          | 0.09 | 0.12      | 207          | 0.00 | 0.10      |
| 169          | 0.00 | 0.07      | 208          | 0.00 | 0.08      |
| 170          | 0.12 | 0.15      | 209          | 0.00 | 0.02      |
| 171+173      | 0.01 | 0.12      |              |      |           |
| 172          | 0.01 | 0.13      |              |      |           |
| 174          | 0.03 | 0.14      |              |      |           |
| 175          | 0.00 | 0.10      |              |      |           |
| 176          | 0.00 | 0.11      |              |      |           |
| 177          | 0.02 | 0.16      |              |      |           |
